# Supplementary material
Source: ML conference proceedings conference paper supplement (https://openaccess.thecvf.com/content/CVPR2021/html/Wang_Scene-Aware_Generative_Network_CVPR_2021_paper.html)
Supplement: Supplementary file 2 [file Wang_Scene-Aware_Generative_Network_CVPR_2021_supplemental.zip]

Archive with 3 entries (3 files):
- 01070-supp.mp4
- __MACOSX/._01070-supp.mp4
- 01070-supp.pdf
